# Supplementary material
Source: Springer Nature journal article supplement (https://www.springermedizin.de/resource/supplementary/13020_2011_131_MOESM2_ESM.pdf/9641040)

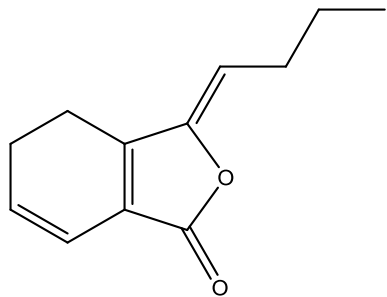

**Z-ligustilide**

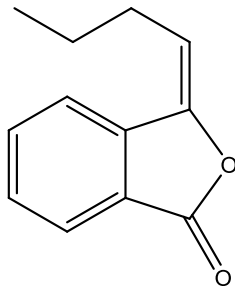

**E-butylidenephthalide**

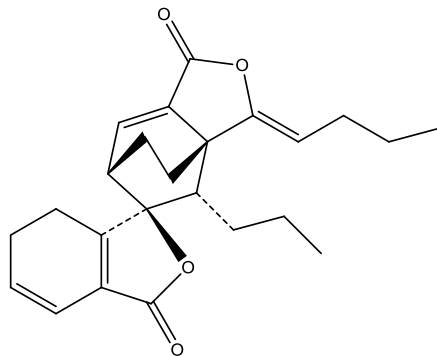

**Z-ligustilide dimer E-232**

**Fig. 2.**

Supplement: MOESM2 [file 9641040]
